# Supplementary material for: Rationally designed RGO@CuO@Mn2O3as an excellent electrocatalyst for the rapid and real-time detection of 2-nitrophenol
Source: Royal Society of Chemistry journal article supplement (doi:10.1039/d0nj02118k), 2020-01-01
Supplement: d0nj02118k1.pdf [file d0nj02118k1.pdf]

S.1.

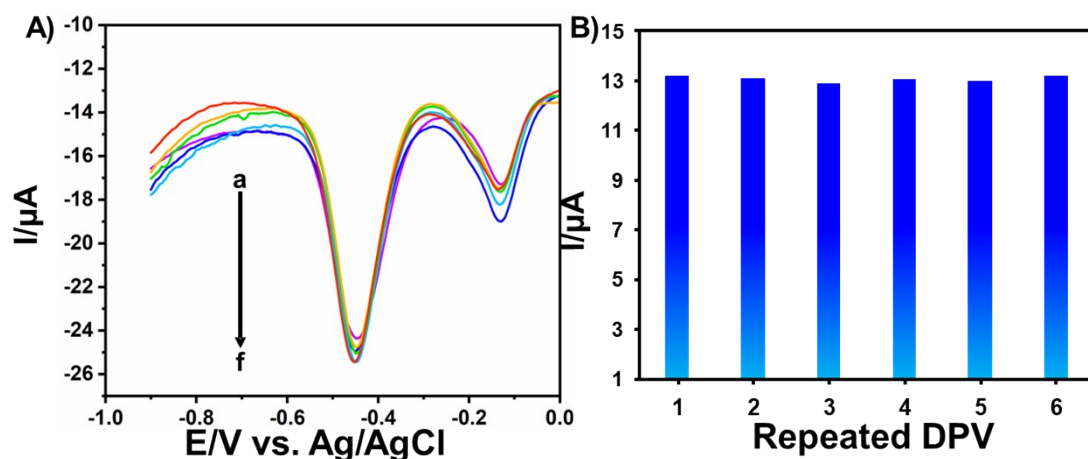

(A) DPV selective responses of a) nitrobenzene, b) catechol, c) hydroquinone, c) resorcinol, d) nitrite, e) mercury, and f) 4-NP at  $\text{RGO}@CuO@Mn_2O_3/\text{GCE}$  towards 100  $\mu\text{M}$  of 2-NP. (B) Bar diagram of repeated DPV vs. current responses.

S.2.

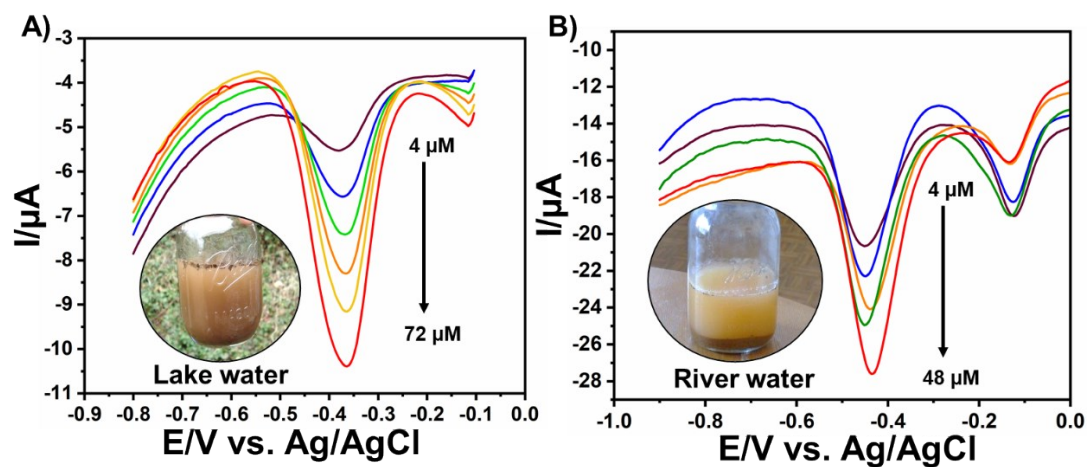

DPV response of  $\text{RGO}@CuO@Mn_2O_3$  modified electrode for each sequential additions of real samples containing 2-NP into continuously stirred phosphate buffer (pH 7). A) Lake water and B) River water.
